# Supplementary material for: A dual-emissive MOF for the simultaneous detection of tetrachlorobenzoquinone isomers in their mixtures
Source: Royal Society of Chemistry journal article supplement (doi:10.1039/c9tc01941c), 2019-01-01
Supplement: c9tc01941c1.pdf [file c9tc01941c1.pdf]

## **Electronic Supplementary Information**

### **A dual-emissive MOF for the simultaneous detection of tetrachlorobenzoquinone isomers in their mixtures**

Xiao-Meng Du, Qian Wang, Qiao Liu, Di Ning, Bo Zhao, Yue Li\* and Wen-Juan Ruan\*

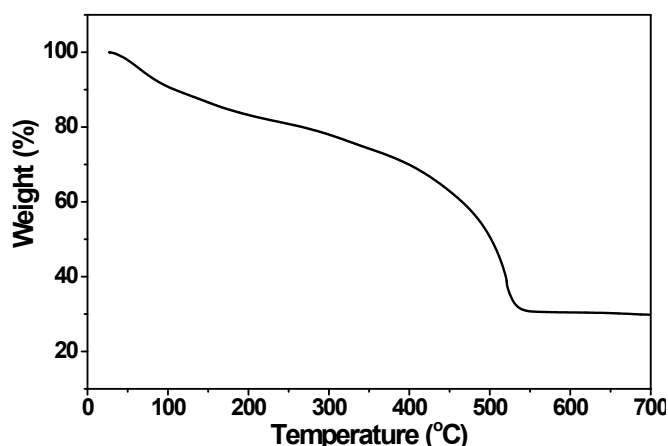

**Fig. S1** Thermogravimetric curve of as-synthesized UiO-66-(COOH)<sub>2</sub> sample in air atmosphere. The overall weight loss from room temperature to 700 °C is 70.18%, which is in good consistency with the calculated value of 70.25% for the loss of all H<sub>2</sub>O molecules, OH<sup>-</sup> ions and organic components based on the formula of [Zr<sub>6</sub>(O)<sub>4</sub>(OH)<sub>4</sub>(H<sub>2</sub>btec)<sub>6</sub>(H<sub>2</sub>O)<sub>16</sub>].

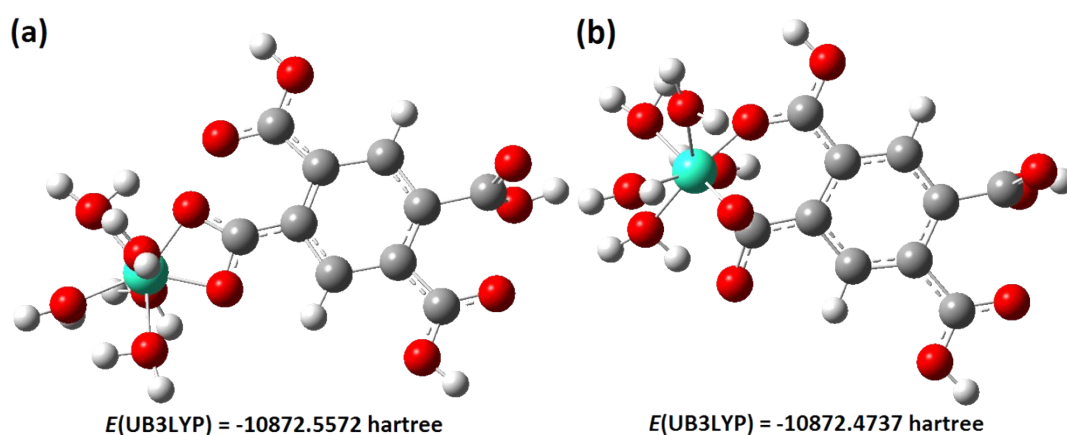

**Fig. S2** Optimized structures of the coordination compounds formed between H<sub>2</sub>btec<sup>2-</sup> and Tb<sup>3+</sup> ion with (a) one and (b) two carboxyl groups take part in coordination. Both the geometry optimization and single point energy calculation were performed using B3LYP functional and a mixed basis set of SDD for Tb and 6-31G(d) for other atoms. The solvent effect was modulated with SMD model (aqueous solvent). The sub-structure of terephthalate in the H<sub>2</sub>btec<sup>2-</sup> ligand was picked up from the crystalline structure of UiO-66, and protons were added to carboxylate groups for charge balance. Two carboxyl groups were added to the central benzene ring, and Tb atom was placed near one of them. five H<sub>2</sub>O molecules were placed around Tb atom to keep the coordination saturation. During the optimization process, the atoms of the initial two carboxylate groups were fixed to replicate the bulk behavior, while the other atoms were relaxed.

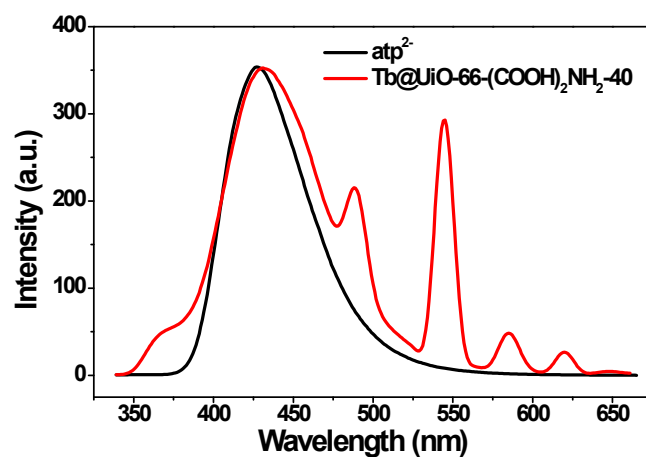

**Fig. S3** Comparison between the photoluminescent spectra of Tb@UiO-66-(COOH)<sub>2</sub>NH<sub>2</sub> (50 mg L<sup>-1</sup>) and free atp<sup>2-</sup> ligand (4 μM, dissolving H<sub>2</sub>atp by 2 equiv of NaOH) in H<sub>2</sub>O-ethanol mixed solvent (v/v = 3/1), λ<sub>ex</sub> = 290 nm.

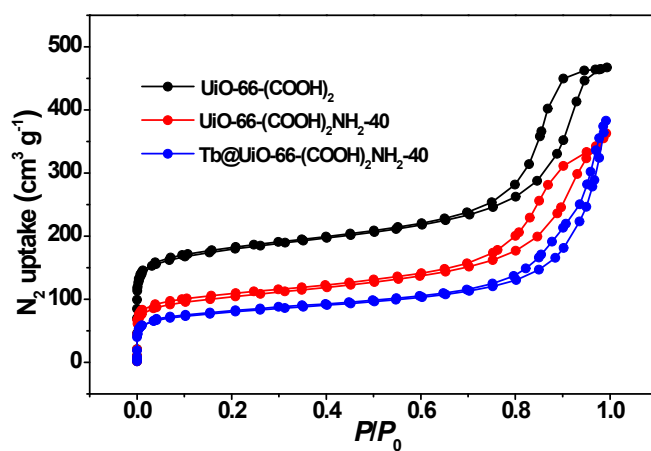

**Fig. S4** N<sub>2</sub> adsorption isotherms (at 77 K) of UiO-66-(COOH)<sub>2</sub> precursor and its product after post-synthetic modification.

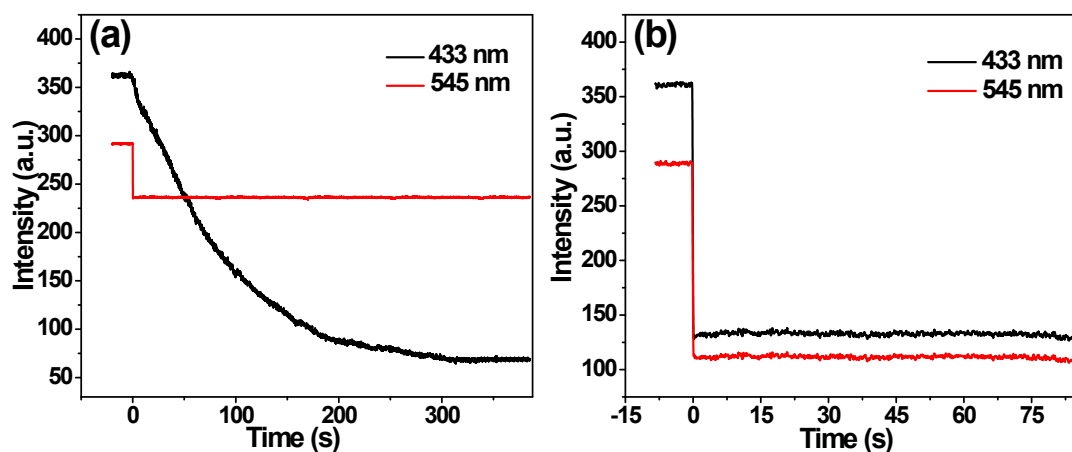

**Fig. S5** Temporal fluorescent change of Tb@UiO-66-(COOH)<sub>2</sub>NH<sub>2</sub>-40 emission intensity upon the addition of (a) *o*-TCBQ (100 μM) and (b) *p*-TCBQ (100 μM). 50 mg L<sup>-1</sup> MOF, in H<sub>2</sub>O-ethanol mixed solvent (*v/v* = 3/1), λ<sub>ex</sub>=290 nm.

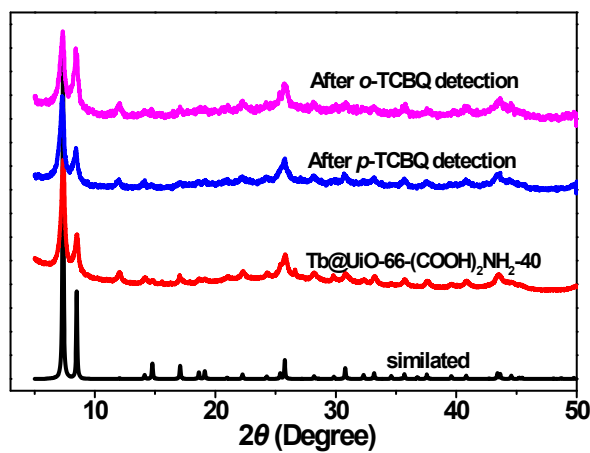

**Fig. S6** Comparison among the PXRD patterns of Tb@UiO-66-(COOH)<sub>2</sub>NH<sub>2</sub>-40 before and after the detection of *o*- and *p*-TCBQs.

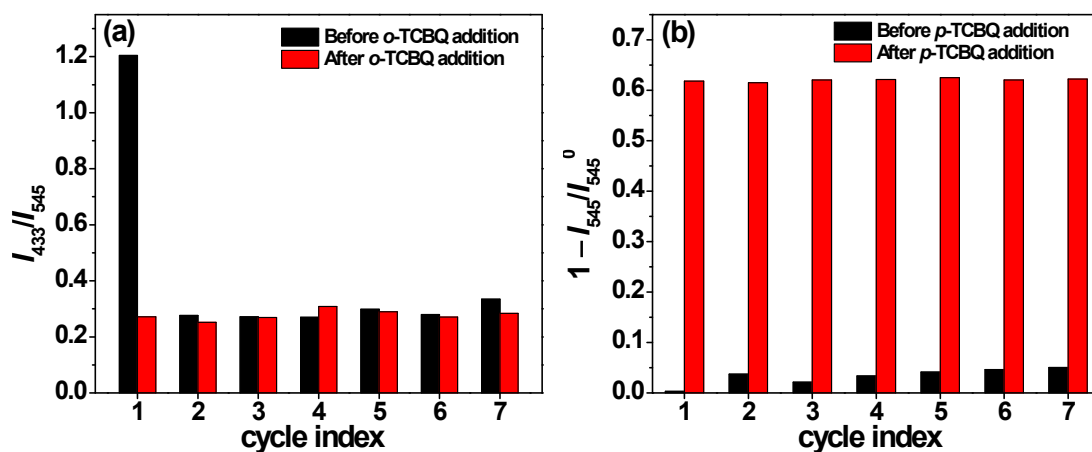

**Fig. S7** Fluorescent signals of Tb@UiO-66-(COOH)<sub>2</sub>NH<sub>2</sub>-40 during 7 consecutive detection and generating cycles with the analyte of (a) *o*-TCBQ (100  $\mu$ M) and (b) *p*-TCBQ (100  $\mu$ M). 50 mg L<sup>-1</sup> MOF, in H<sub>2</sub>O-ethanol mixed solvent (v/v = 3/1),  $\lambda_{ex}$ =290 nm.

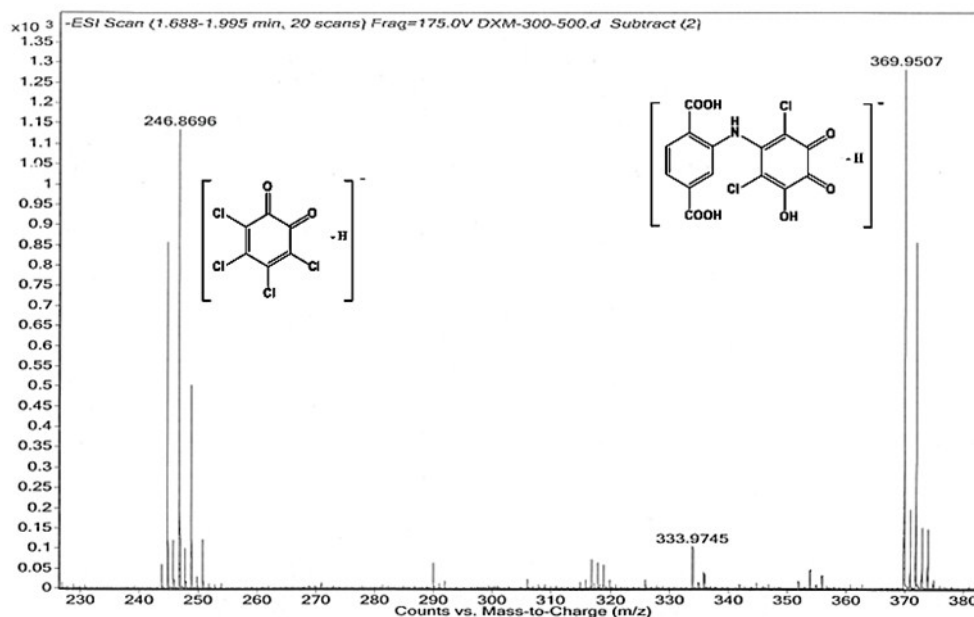

**Fig. S8** ESI-MS (negative mode) of the digested solution of UiO-66-NH<sub>2</sub> after the treatment by *o*-TCBQ.

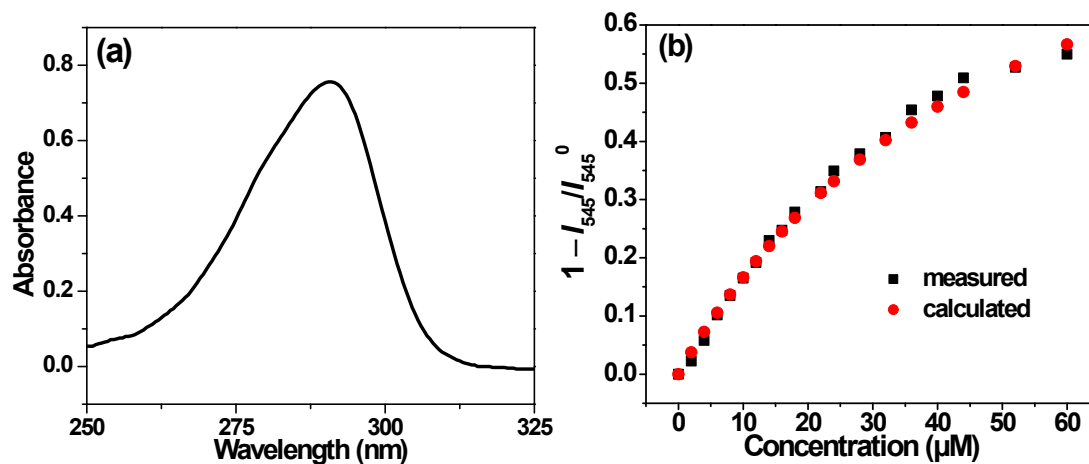

**Fig. S9** (a) Absorption spectrum of *p*-TCBQ (50 μM). (b) Comparison between the calculated and measured quenching efficiency of Tb@UiO-66-(COOH)<sub>2</sub>NH<sub>2</sub>-40 (50 mg L<sup>-1</sup>) upon the exposure to different concentrations of *p*-TCBQ,  $\lambda_{\text{ex}}=290$  nm.

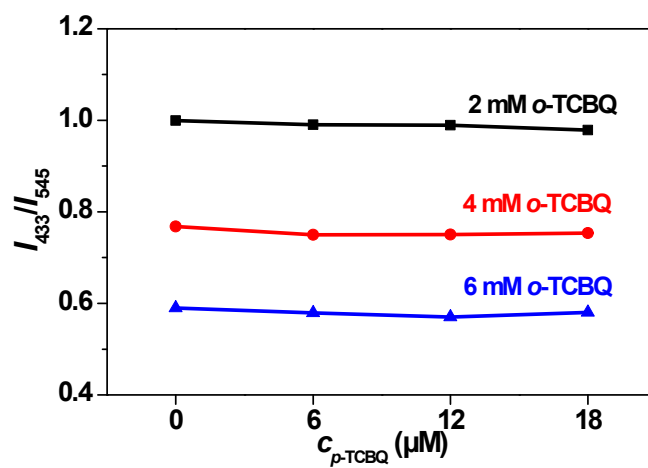

**Fig. S10** Effect of *p*-TCBQ on the ratiometric fluorescent signal induced by *o*-TCBQ,  $\lambda_{\text{ex}} = 290$  nm.

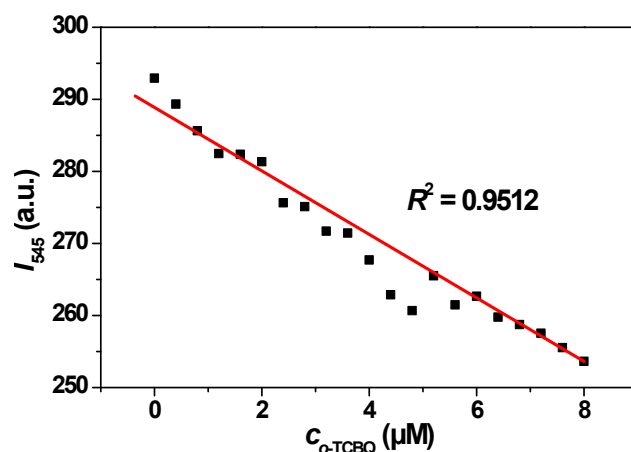

Fig. S11 Linear fitting of the intensity change of Tb@UiO-66-(COOH)<sub>2</sub>NH<sub>2</sub>-40 at 545 nm with the addition of different concentrations of *o*-TCBQ.

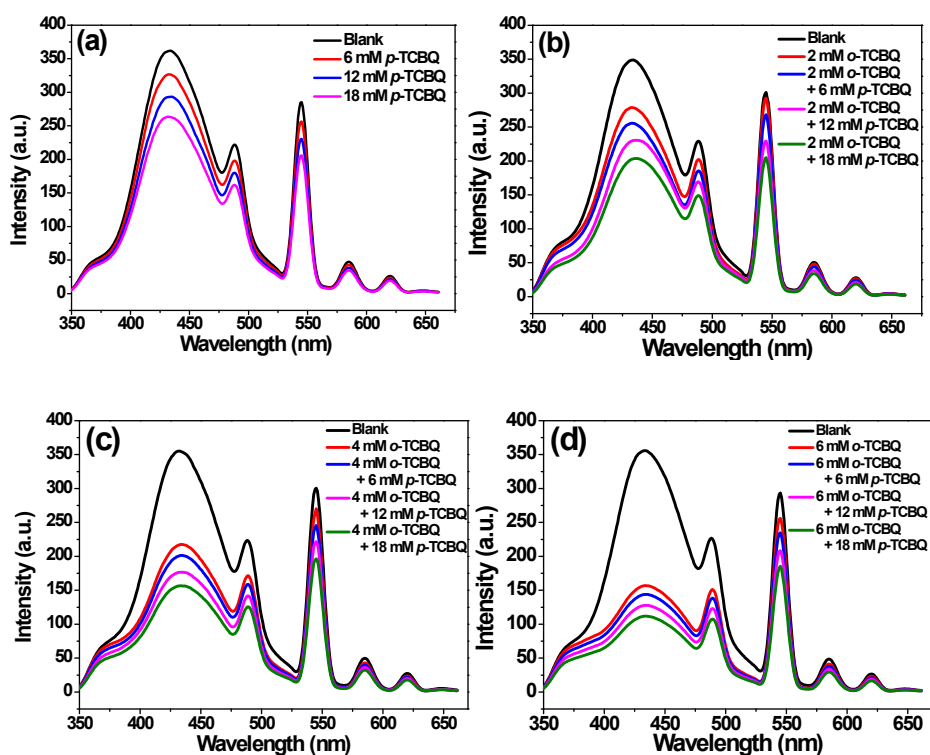

Fig. S12 The photoluminescent spectra of Tb@UiO-66-COOH<sub>2</sub>NH<sub>2</sub>-40 (50 mg L<sup>-1</sup>) in the mixed solutions of *o*- and *p*-TCBQs,  $\lambda_{\text{ex}} = 290$  nm.

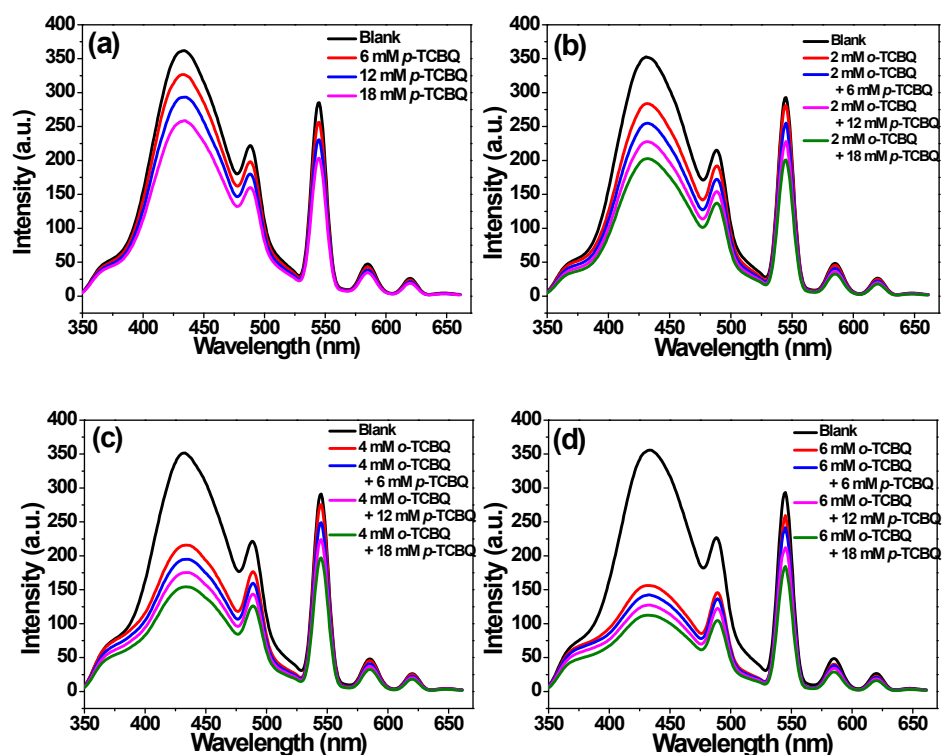

Fig. S13 The photoluminescent spectra of Tb@UiO-66-COOH<sub>2</sub>NH<sub>2</sub>-40 (50 mg L<sup>-1</sup>) in artificial urine under the addition of different concentrations of *o*- and *p*-TCBQs,  $\lambda_{\text{ex}} = 290$  nm.



**Table S1** The ICP-OES results of Tb@UiO-66-(COOH)<sub>2</sub>NH<sub>2</sub>-40 before and after detection experiment

| Material                       | Zr (Wt%) | Tb (Wt%) | Molecular ratio<br>Zr:Tb |
|--------------------------------|----------|----------|--------------------------|
| As-prepared                    | 13.7     | 4.82     | 2.84:1                   |
| After <i>o</i> -TCBQ detection | 11.36    | 4.04     | 2.81:1                   |
| After <i>p</i> -TCBQ detection | 12.90    | 4.62     | 2.79:1                   |
